# Supplementary material for: Kinetics of the OH + NO 2 reaction: Rate coefficients (217–333 K, 16–1200 mbar) and fall-off parameters for N 2 and O 2 bath-gases
Source: Copernicus journal article supplement (doi:10.5194/acp-2019-297), 2019-05-13
Supplement: Supplementary file 1 [file acp-2019-297-supplement.pdf]

# Kinetics of the OH + NO<sub>2</sub> reaction: Rate coefficients (217-333 K, 16-1200 mbar) and fall-off parameters for N<sub>2</sub> and O<sub>2</sub> bath-gases

Damien Amedro<sup>1</sup>, Arne J. C. Bunkan<sup>1</sup>, Matias Berasategui<sup>1</sup> and John N. Crowley<sup>1</sup>

5 <sup>1</sup>Division of Atmospheric Chemistry, Max-Planck-Institut für Chemie, 55128 Mainz, Germany

Correspondence to: John N. Crowley (john.crowley@mpic.de)

## Supplementary Information

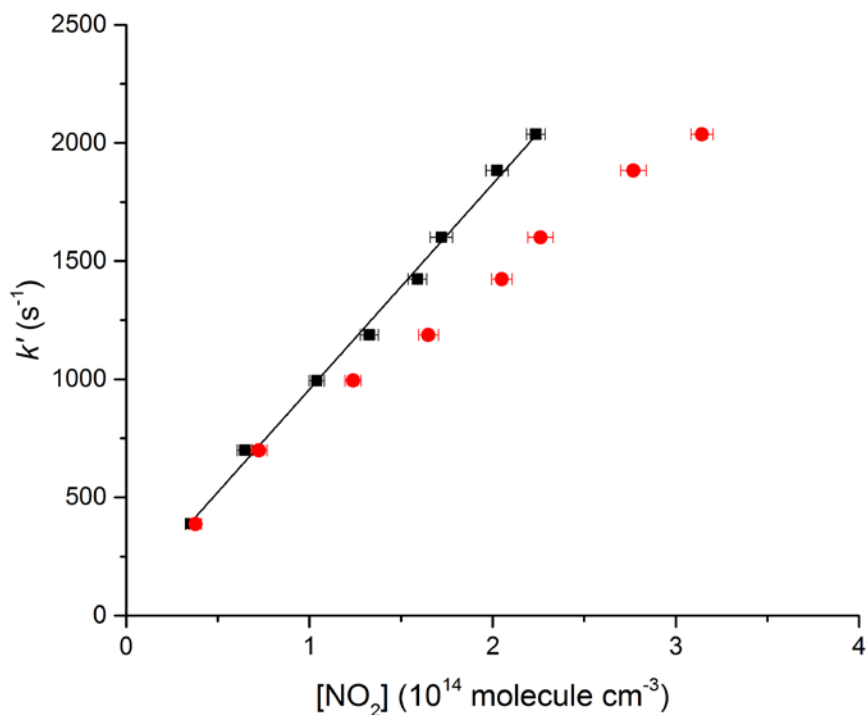

**Figure S1.** Red circles: Bimolecular plot of the OH reaction with NO<sub>2</sub> measured at 78.8 Torr N<sub>2</sub> and 217 K. The black squares were obtained by accounting for loss of NO<sub>2</sub> via N<sub>2</sub>O<sub>4</sub> formation.

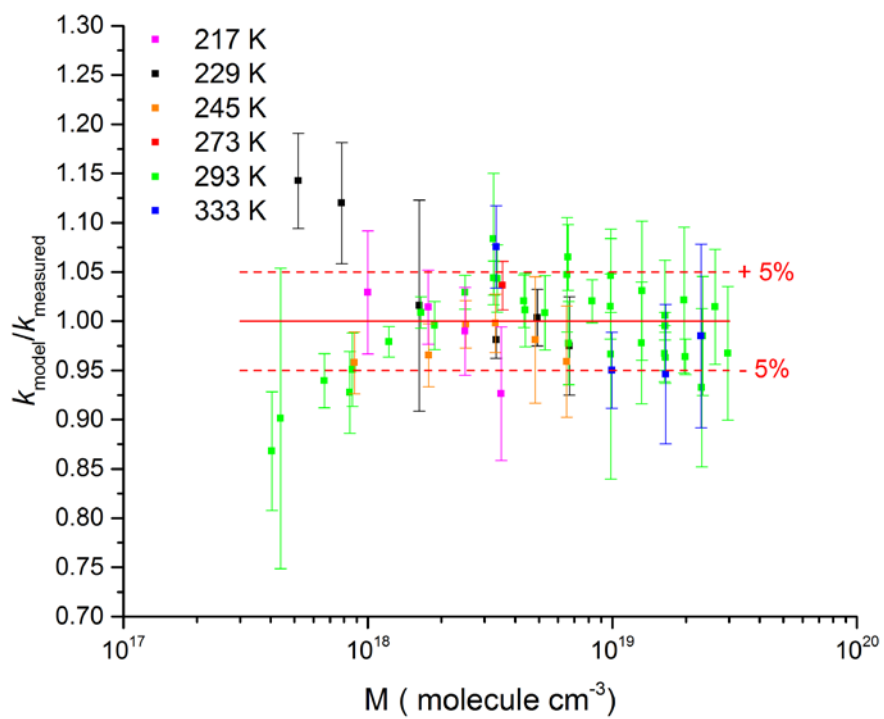

**Figure S2.** Ratio of the parametrised rate coefficient ( $k_{\text{param}}$ ) to measurements ( $k_{\text{meas}}$ ) as a function of the molecular density ( $M$ ) for 6 different temperatures.

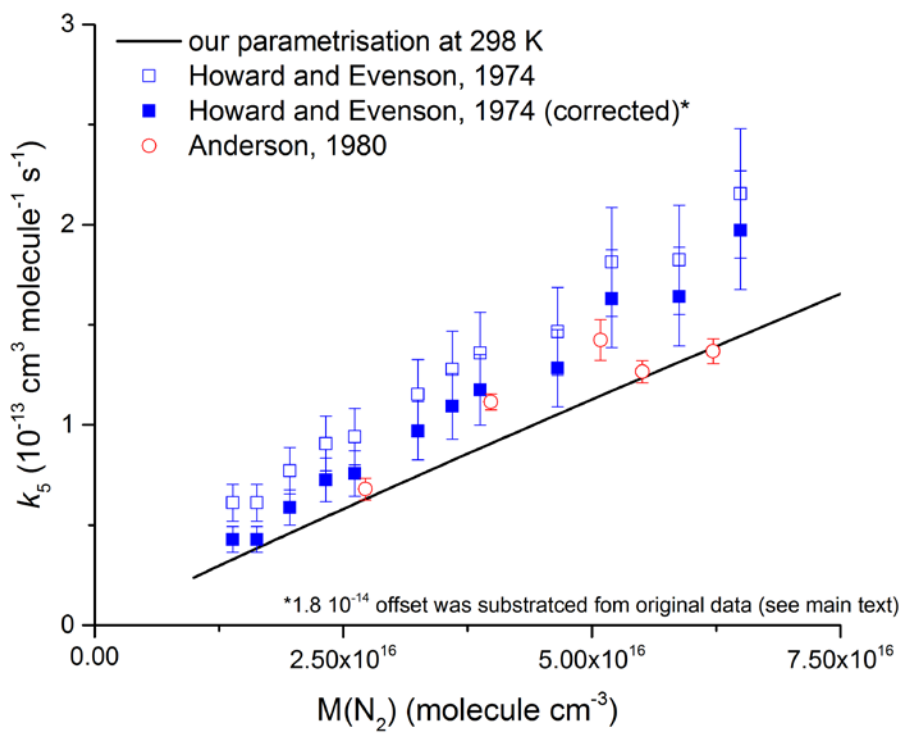

**Figure S3.** Comparison of the present parametrisation with low-pressure measurements by Howard and Evenson (1974) (open and closed blue squares) and Anderson (Anderson, 1980) (open red circles).

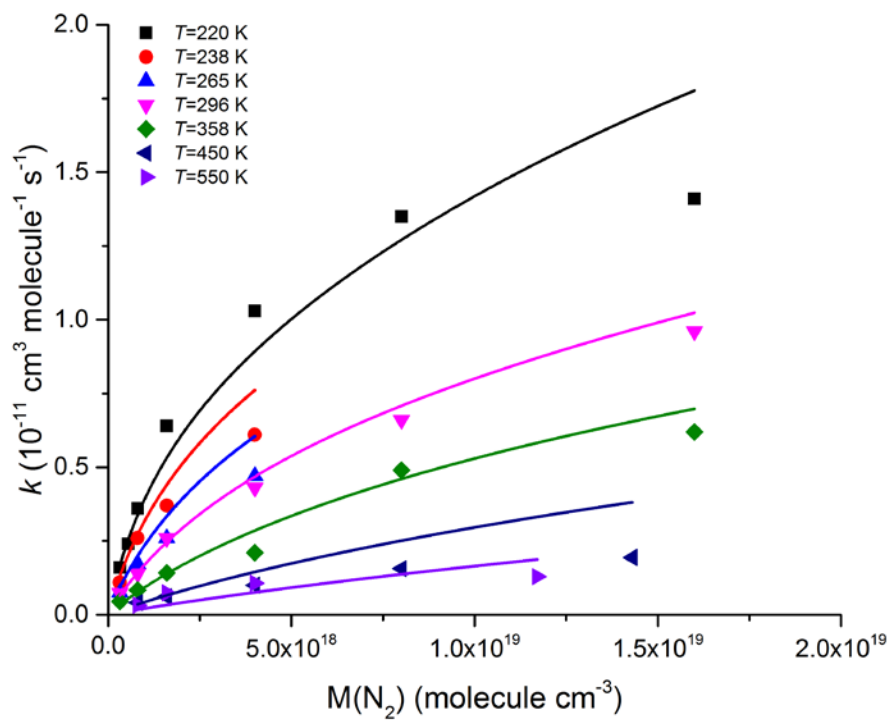

**Figure S4.** Comparison of the present parametrization with values of  $k_5$  reported by Anastasi and Smith (1976), who report 36% overall uncertainty in  $k_5$  ( $2 \sigma$ )

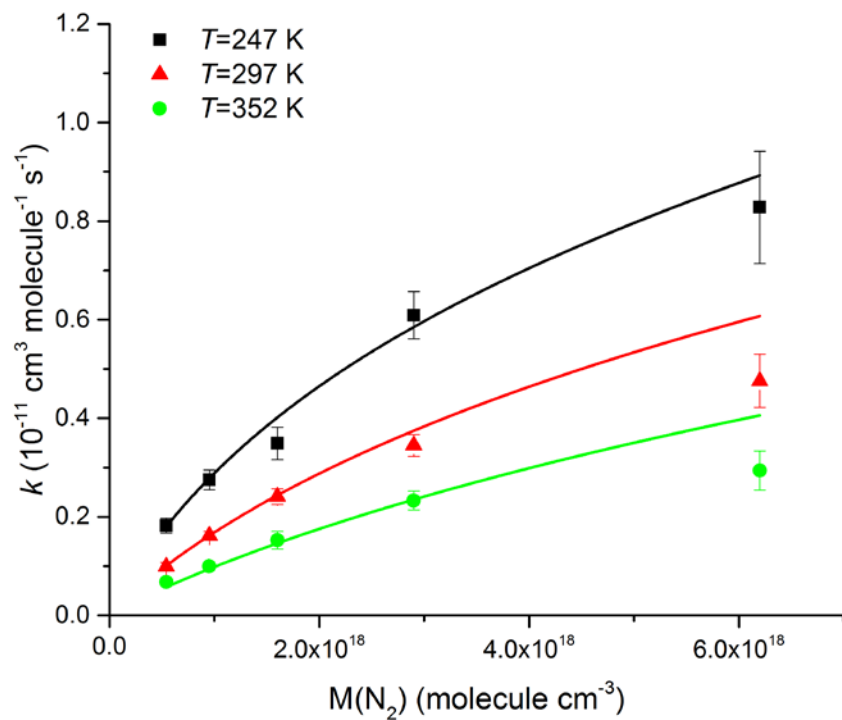

**Figure S5.** Comparison of the present parametrization with values of  $k_5$  reported by Wine et al. (1979) where the error bars ( $2\sigma$ ) represent total overall uncertainty.

5

10

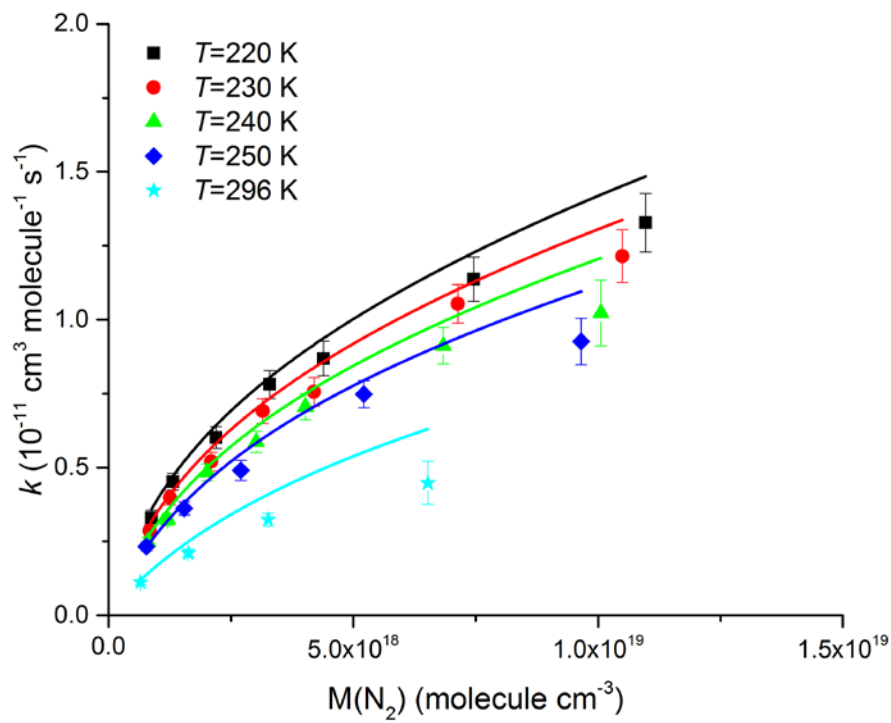

**Figure S6.** Comparison of the present parametrization with values of  $k_5$  reported by Brown et al. (1999) where the error bars ( $2\sigma$ ) represent total overall uncertainty.

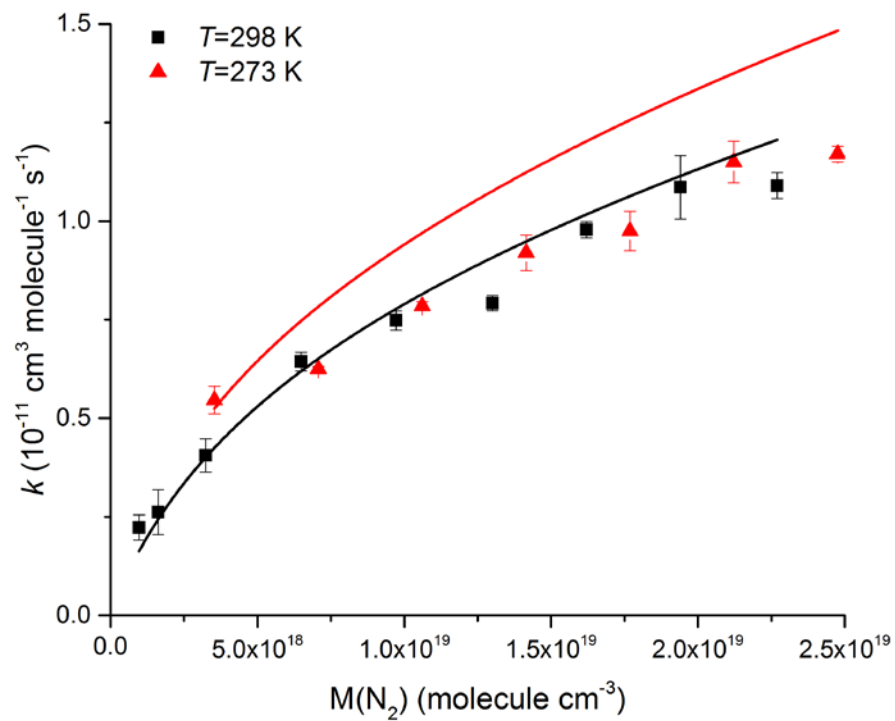

**Figure S7.** Comparison of the present parametrization with values of  $k_5$  reported by D'Ottone et al. (2001) where the error bars ( $2\sigma$ ) represent total overall uncertainty.

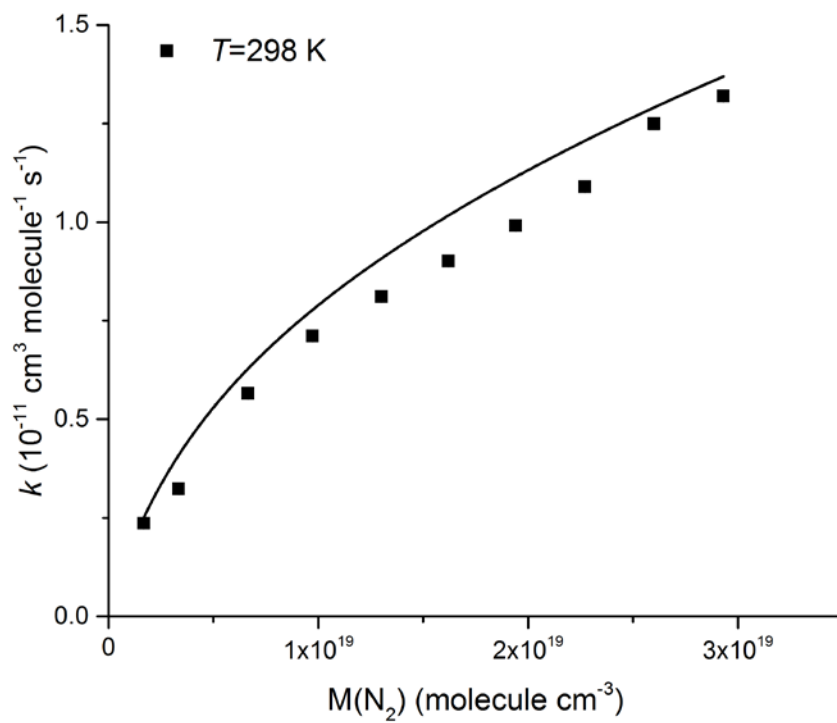

**Figure S8.** Comparison of the present parametrization with values of  $k_5$  reported by Mollner et al. (2010). The reported  $2\sigma$  (statistical) uncertainty is  $< 2\%$  is within the symbol size.



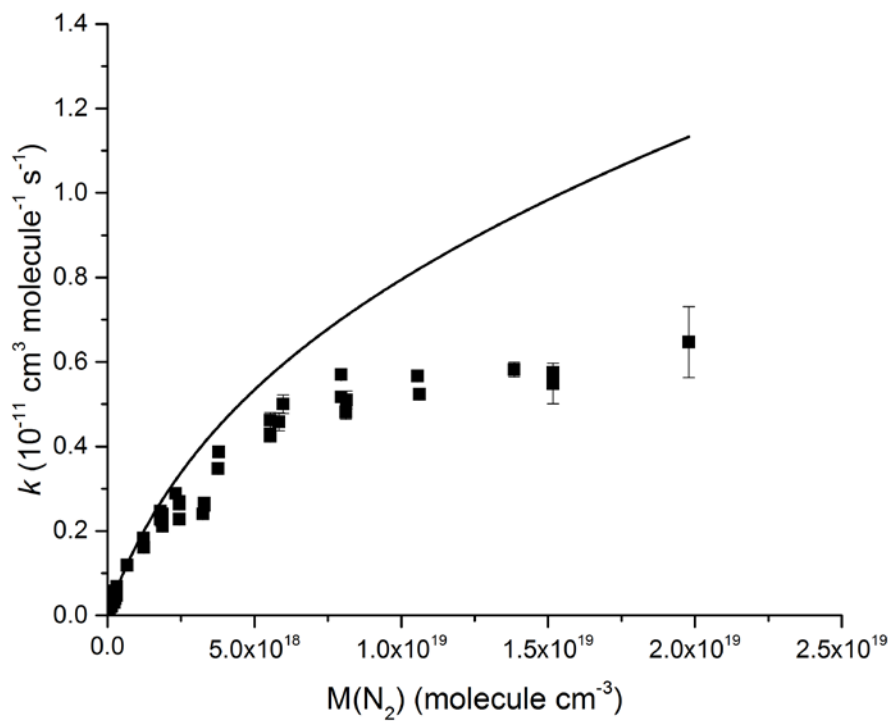

**Figure S9.** Comparison of the present parametrization with values of  $k_5$  reported by Donahue et al. (1997) where the error bars ( $2\sigma$ ) represent total overall uncertainty.

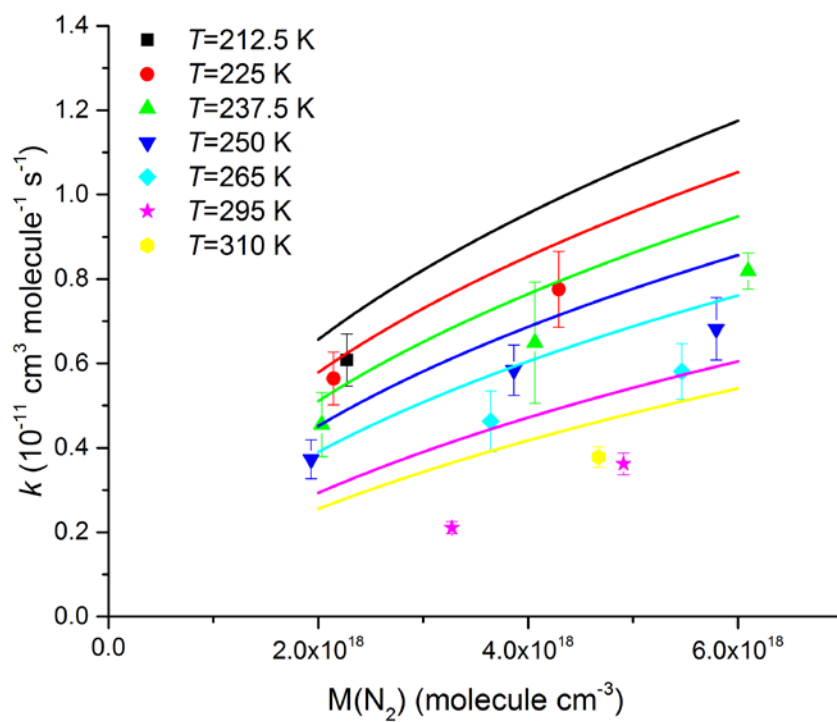

**Figure S10.** Comparison of the present parametrization with values of  $k_5$  reported by Dransfield et al. (1999).

## References

- 5 Anastasi, C. and Smith, I. W. M.: Rate measurements of reactions of OH by resonance absorption. Part 5.-Rate constants for OH + NO<sub>2</sub> (+M) -> HNO<sub>3</sub> (+M) over a wide range of temperature and pressure, *Journal of the Chemical Society, Faraday Transactions 2: Molecular and Chemical Physics*, 72, 1459-1468, 1976.
- 10 Anderson, L. G.: Absolute rate constants for the reaction of OH with NO<sub>2</sub> in N<sub>2</sub> and He from 225 to 389 K, *J. Phys. Chem.*, 84, 2152-2155, 1980.
- Brown, S. S., Talukdar, R. K., and Ravishankara, A. R.: Rate constants for the reaction OH+NO<sub>2</sub>+M -> HNO<sub>3</sub>+M under atmospheric conditions, *Chem. Phys. Lett.*, 299, 277-284, 1999.
- D'Ottone, L., Campuzano-Jost, P., Bauer, D., and Hynes, A. J.: A pulsed laser photolysis-pulsed laser induced fluorescence study of the kinetics of the gas-phase reaction of OH with NO<sub>2</sub>, *J. Phys. Chem. A*, 105, 10538-10543, 2001.
- 15 Donahue, N. M., Dubey, M. K., Mohrschladt, R., Demerjian, K. L., and Anderson, J. G.: High-pressure flow study of the reactions OH+NO<sub>x</sub>->HONO<sub>x</sub>: Errors in the falloff region, *J. Geophys. Res. -Atmos.*, 102, 6159-6168, 1997.
- Dransfield, T. J., Perkins, K. K., Donahue, N. M., Anderson, J. G., Sprengnether, M. M., and Demerjian, K. L.: Temperature and pressure dependent kinetics of the gas-phase reaction of the hydroxyl radical with nitrogen dioxide, *Geophys. Res. Lett.*, 26, 687-690, 1999.
- 20 Howard, C. J. and Evenson, K. M.: Laser magnetic-resonance study of gas-phase reactions of OH with CO, NO, and NO<sub>2</sub>, *J. Chem. Phys.*, 61, 1943-1952, 1974.
- Mollner, A. K., Valluvadasan, S., Feng, L., Sprague, M. K., Okumura, M., Milligan, D. B., Bloss, W. J., Sander, S. P., Martien, P. T., Harley, R. A., McCoy, A. B., and Carter, W. P. L.: Rate of gas phase association of hydroxyl radical and nitrogen dioxide, *Science*, 330, 646-649, 2010.
- 25 Wine, P. H., Kreutter, N. M., and Ravishankara, A. R.: Flash photolysis-resonance fluorescence kinetics study of the reaction OH + NO<sub>2</sub> +M -> HNO<sub>3</sub> + M, *J. Phys. Chem.*, 83, 3191-3195, 1979.
